# Supplementary material for: Phylogeny and biogeography of African Murinae based on mitochondrial and nuclear gene sequences, with a new tribal classification of the subfamily
Source: PubMed Central journal article supplement (PMC2490707; doi:10.1186/1471-2148-8-199), 2008-07-10

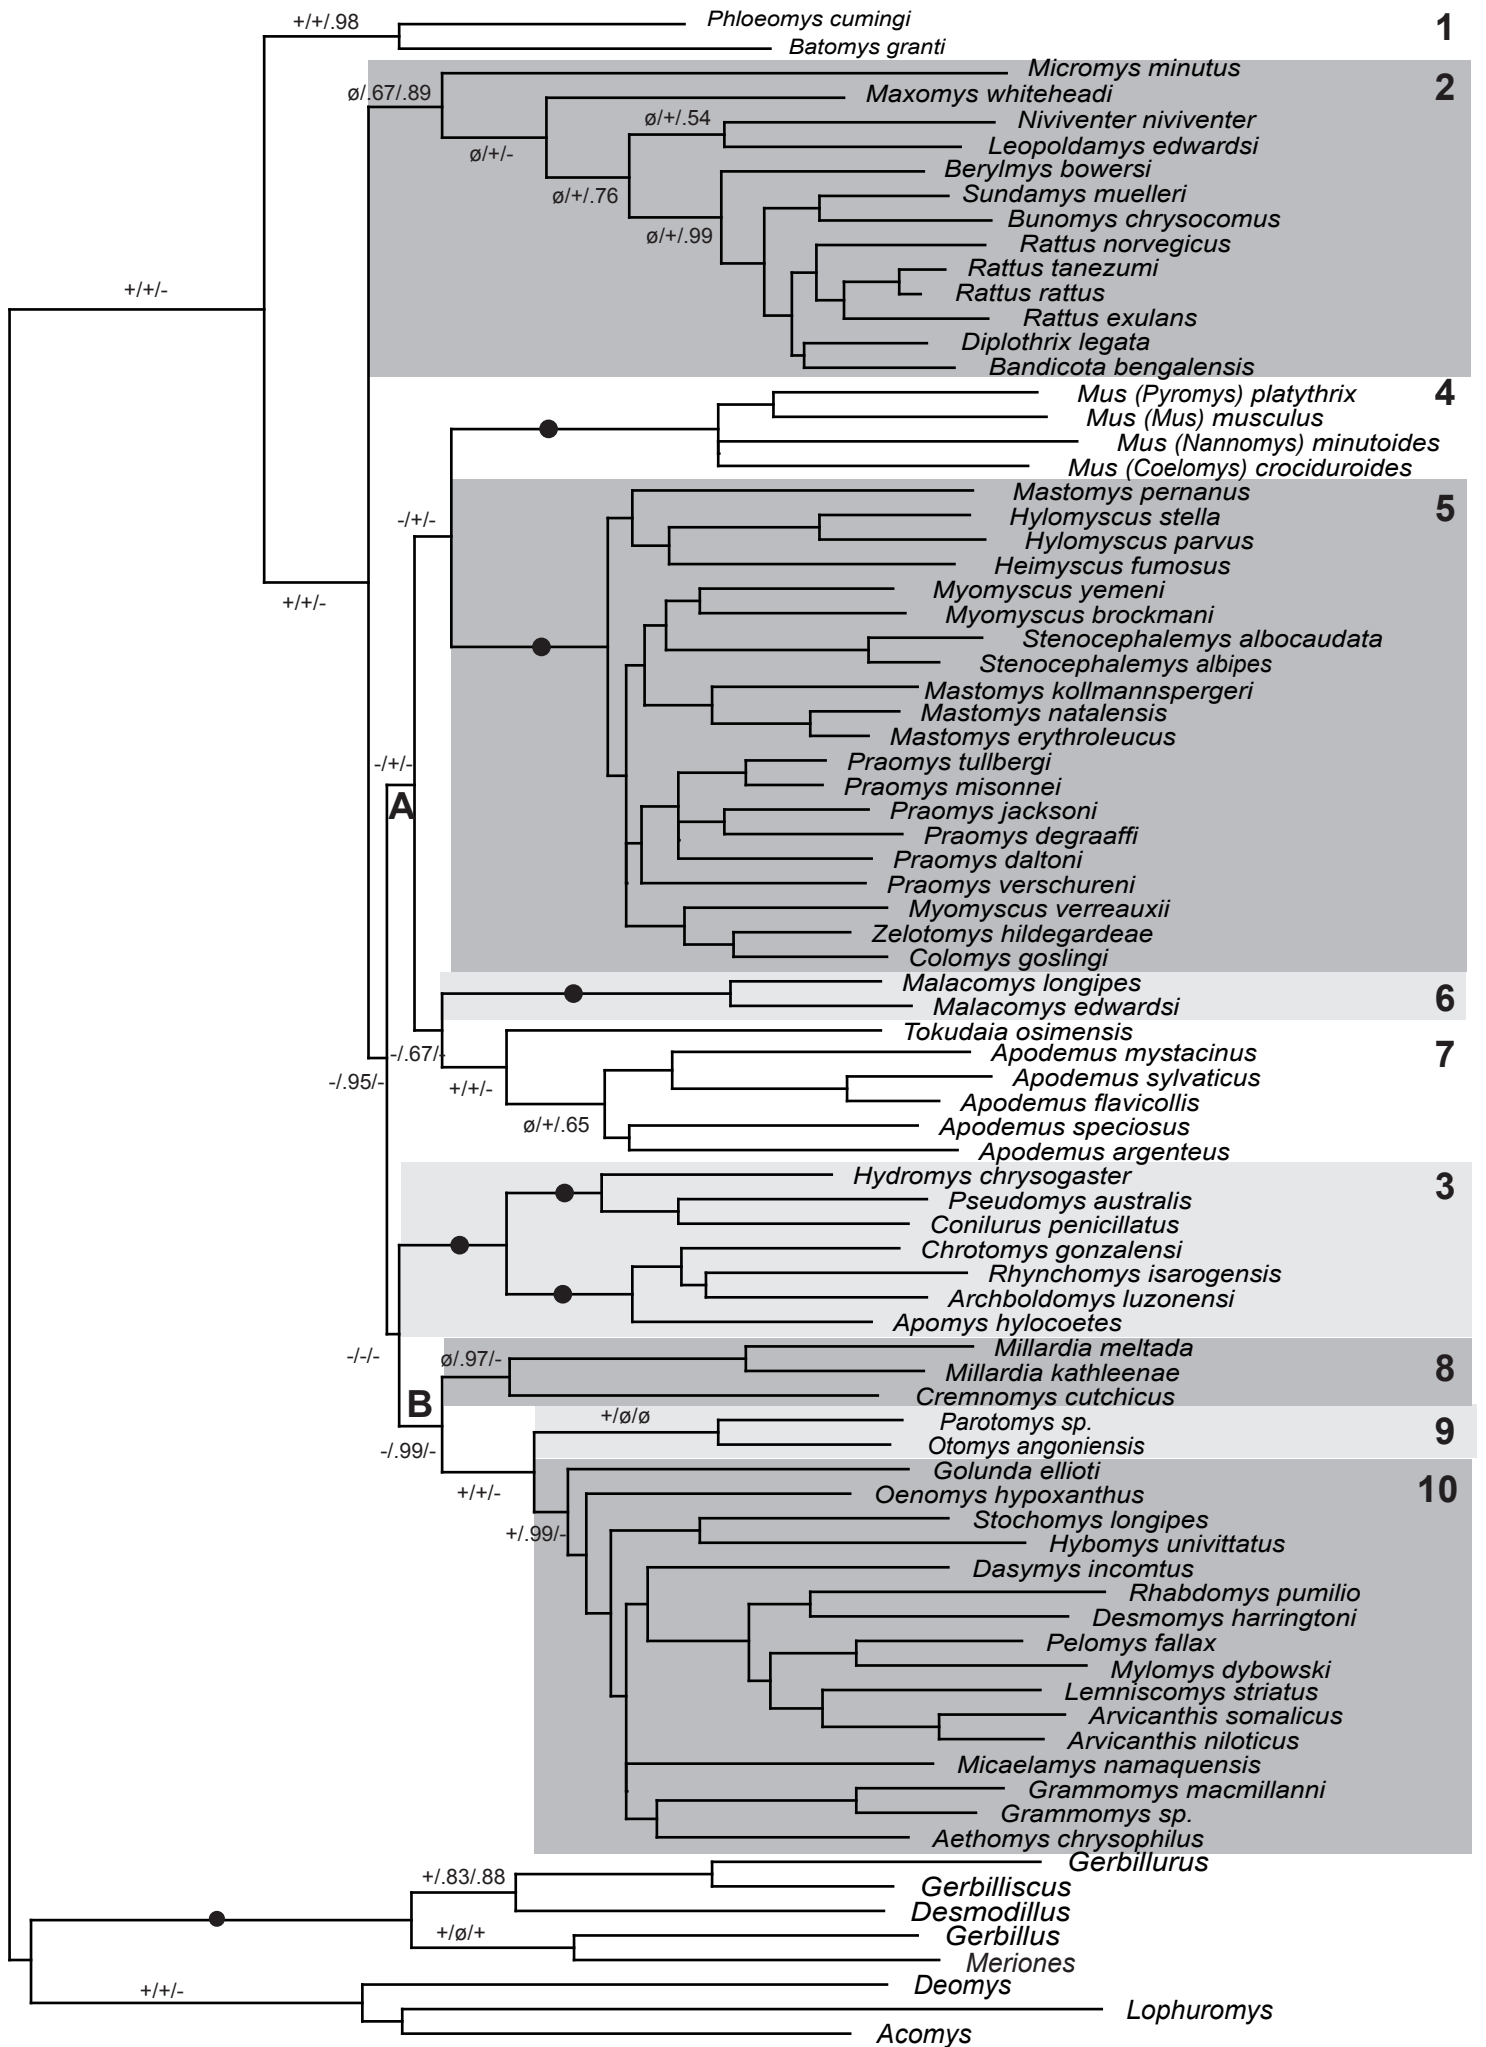

Supplement: 1471-2148-8-199-S2.pdf [file 1471-2148-8-199-S2.pdf]
